# Supplementary material
Source: publisher figshare collection journal article supplement (https://gsajournals.figshare.com/ndownloader/files/15112094)
Supplement: Supplementary file 1 [file 15112094]

## Sheet: Sheet1
Screen	failed	Z-score hits	q(x) hits	mu1	mu2	sigma1	sigma2	rho1	rho2	Z-score cutoff	q(x) cutoff	p-value cutoff	FDR adjustment cutoff	predicted 20% FDR cutoff
Ase1	1	43	148	-0.0766767	0.00373734	0.365272	0.0738139	0.100883	0.899117	0.270935	0.215261	0.639244	1.96145	0.519263
Cdc11	0	136	294	-0.006165	0.186557	0.103912	0.683571	0.882029	0.117971	0.540116	0.284261	0.197499	0.284957	0.776967
Cop1	0	155	452	-0.00291654	0.18248	0.0690551	0.402592	0.861464	0.138536	0.373019	0.182134	0.132429	0.183312	0.474023
Dad2	1	112	394	-0.000177996	0.0131205	0.0491394	0.212262	0.816263	0.183737	0.205021	0.121896	0.0961335	0.137976	0.276748
Heh2	0	208	462	-0.00954996	0.642022	0.105134	0.797423	0.885085	0.114915	0.775419	0.293812	0.196509	0.266458	0.871846
Hta2	0	171	463	-0.00311391	0.151831	0.0399577	0.322569	0.866649	0.133351	0.286149	0.109462	0.0752018	0.102385	0.348283
Iqg1	1	65	384	-0.00286866	0.0427637	0.0941079	0.326708	0.821435	0.178565	0.331741	0.224784	0.181579	0.264535	0.46049
Loa1	0	125	793	-0.00764499	0.147924	0.0964477	0.343482	0.737287	0.262713	0.445767	0.199817	0.181389	0.239572	0.474388
Nop10	0	136	527	-0.00509865	0.123648	0.0682027	0.328529	0.827402	0.172598	0.332393	0.166029	0.128576	0.175308	0.407804
Nuf2	0	138	374	-0.00270616	0.224131	0.0786154	0.462271	0.885881	0.114119	0.397717	0.214623	0.151377	0.212817	0.543582
Nup53	1	62	261	-0.014211	0.000698263	0.209372	0.0480193	0.138388	0.861612	0.178424	0.128344	0.39615	Inf	0.317651
Om45	0	163	379	-0.00407546	0.293066	0.0757589	0.557457	0.891705	0.108295	0.4631	0.213244	0.144409	0.202288	0.616609
Pil1	0	151	369	-0.00487432	0.273841	0.0667569	0.556547	0.88924	0.11076	0.454618	0.188958	0.125967	0.176276	0.597041
Psr1	0	154	396	-0.00521341	0.353863	0.065215	0.528835	0.896002	0.103998	0.456006	0.185967	0.122606	0.169496	0.570295
Pus1	1	40	229	-0.000484244	0.0251995	0.0583905	0.362076	0.886506	0.113494	0.270541	0.163704	0.113959	0.17	0.421027
Rad52	1	63	305	-0.000944292	0.0269604	0.0452123	0.271515	0.864622	0.135378	0.220463	0.122185	0.0876701	0.12578	0.317993
Sac6	0	101	221	-0.00408464	0.224265	0.0848466	0.576352	0.919199	0.0808007	0.400822	0.246123	0.162212	0.241053	0.650679
Sec3	1	100	437	-0.000607259	0.0602726	0.0506965	0.216937	0.835258	0.164742	0.213496	0.126096	0.0987561	0.137914	0.283368
Sec7	0	215	499	-0.00901235	0.246787	0.0858806	0.523988	0.837556	0.162444	0.521177	0.216588	0.159311	0.217768	0.603748
Sec63	0	264	600	-0.00697131	0.314119	0.0563151	0.438375	0.848762	0.151238	0.465843	0.149251	0.103404	0.136442	0.474605
SKL	1	60	269	-0.00357656	0.0595141	0.0587057	0.22494	0.874084	0.125916	0.202593	0.148589	0.111484	0.166252	0.303184
Vph1	0	113	406	-0.00401894	0.138977	0.0521019	0.320033	0.871994	0.128006	0.280842	0.138362	0.098099	0.136299	0.369531
Vps35	0	102	346	-0.00131131	0.181585	0.0560033	0.429311	0.893442	0.106558	0.33837	0.160312	0.108453	0.152275	0.472012
Nud1	0	199	580	-0.0300425	0.551641	0.160935	0.631013	0.789965	0.210035	0.892809	0.346948	0.285384	0.366907	0.822924
Spc42	0	211	573	-0.0156812	0.498863	0.104906	0.627568	0.797377	0.202623	0.813519	0.251227	0.189931	0.240271	0.722306
Spc72	0	142	330	-0.0139281	0.25951	0.108444	0.466209	0.847958	0.152042	0.486649	0.259432	0.198619	0.27497	0.595338
Spc110N	0	164	746	-0.0189118	0.232503	0.0797344	0.463374	0.704867	0.295133	0.62457	0.164347	0.137365	0.169854	0.530543
Spc110C	0	136	489	-0.01418	0.212968	0.0977441	0.439136	0.789462	0.210538	0.510015	0.218122	0.177395	0.235129	0.550896
